# Supplementary material for: Sorption and biodegradation of stormwater trace organic contaminants via composite alginate bead geomedia with encapsulated microorganisms
Source: Royal Society of Chemistry journal article supplement (doi:10.1039/d4ew00600c), 2024-01-01
Supplement: d4ew00600c1.pdf [file d4ew00600c1.pdf]

**Supplementary Information**

**Sorption and Biodegradation of Stormwater Trace Organic  
Contaminants via Composite Alginate Bead Geomedia with  
Encapsulated Microorganisms**

*Debojit S. Tanmoy*<sup>a, b</sup> and *Gregory H. LeFevre*<sup>\*, a, b</sup>

<sup>a</sup> Department of Civil and Environmental Engineering, University of Iowa, 4105 Seamans  
Center, Iowa City, Iowa, 52242, United States

<sup>b</sup> IIHR—Hydroscience and Engineering, University of Iowa, 100 C. Maxwell Stanley Hydraulics  
Laboratory, Iowa City, Iowa, 52242, United States

\*Corresponding Author:

gregory-lefevre@uiowa.edu; Phone: 319-335-5655; 4105 Seamans Center for Engineering,  
University of Iowa, Iowa City IA, United States

**14** total pages, **2** Figures, and **7** Tables

## Table of Contents

|                                                                                                                                                                                                                                                    |    |
|----------------------------------------------------------------------------------------------------------------------------------------------------------------------------------------------------------------------------------------------------|----|
| <b>Section S 1: Synthetic Stormwater Recipe</b> .....                                                                                                                                                                                              | 3  |
| <b>Section S 2: Analytical Method Details</b> .....                                                                                                                                                                                                | 3  |
| <b>Figure S 1.</b> Neonicotinoid sorption onto different BioSorp Beads.....                                                                                                                                                                        | 4  |
| <b>Figure S 2.</b> Overview summary of BioSorp Bead preparation..                                                                                                                                                                                  | 5  |
| <b>Table S 1.</b> Compositions of different types of BioSorp beads.....                                                                                                                                                                            | 6  |
| <b>Table S 2 (a).</b> Experimental design for abiotic sorption experiments.....                                                                                                                                                                    | 7  |
| <b>Table S 2 (b).</b> Experimental design for abiotic sorption experiments. ....                                                                                                                                                                   | 8  |
| <b>Table S 3.</b> Experimental design for coupled sorption-biodegradation experiments. ....                                                                                                                                                        | 9  |
| <b>Table S 4.</b> First order rate constants (with 95% confidence interval level) for imidacloprid and desnitro-imidacloprid sorption onto different PAC-Wood dust beads. [The detailed compositions of these beads are in <b>Table S 1</b> ]..... | 10 |
| <b>Table S 5.</b> Phosphate sorption (with 95% confidence interval level) onto various BioSorp beads (Calcium-alginate and iron-alginate beads).....                                                                                               | 10 |
| <b>Table S 6.</b> Acetanilide, Imidacloprid, and Desnitro-imidacloprid sorption (with 95% confidence interval level) onto various BioSorp beads (Calcium-alginate and iron-alginate beads). ....                                                   | 11 |
| <b>Table S 7.</b> Sorption of different long and short-chain PFAS onto various BioSorp beads (Calcium-alginate and iron-alginate beads), different black carbon materials, iron-based materials, and aluminum-based materials.....                 | 12 |
| <b>REFERENCES</b> .....                                                                                                                                                                                                                            | 13 |

### **Section S 1: Synthetic Stormwater Recipe.**

We prepared our synthetic stormwater (pH:  $7\pm 0.2$ ) by dissolving 0.072 mM  $\text{NH}_4\text{Cl}$ , 0.75 mM  $\text{CaCl}_2$ , 0.33 mM  $\text{Na}_2\text{SO}_4$ , 0.072 mM  $\text{NaNO}_3$ , 1 mM  $\text{NaHCO}_3$ , 0.075 mM  $\text{MgCl}_2$ , and 0.016 mM  $\text{Na}_2\text{HPO}_4$  in deionized water. The pH was adjusted using NaOH and/or HCl.

### **Section S 2: Analytical Method Details.**

We used Agilent 1260 Infinity liquid chromatograph and Agilent 6460 triple quadrupole mass spectrometer to measure imidacloprid and desnitro-imidacloprid concentration for the LC-MS/MS analysis [column: Agilent Zorbax eclipse plus C18 (4.6 mm  $\times$  150 mm  $\times$  5  $\mu\text{m}$ ); guard column: Zorbax eclipse plus C18 (4.6 mm  $\times$  12.5 mm  $\times$  5  $\mu\text{m}$ )]. We used the following MS/MS parameters— gas temperature ( $\text{N}_2$ ): 300 deg C, gas flow: 5 L/min, nebulizer pressure: 45 psi, sheath gas temperature: 250 deg C, sheath gas flow: 11 L/min, capillary voltage (+)(-): 3500/3500 V, nozzle voltage (+)(-): 500/500 V, injection volume: 20  $\mu\text{L}$ , column temperature: 50 deg C, mobile phase A: 77.5% water with 0.1% formic acid, mobile phase B: 22.5% acetonitrile with 0.1% formic acid, and flow rate: 0.8 mL/min. Parent ion (m/z), quant Ion (m/z) [Collision Energy, V], qual Ion (m/z) [Collision Energy, V], fragment voltage (V), dwell time (ms), polarity, and accelerator voltage (V) for imidacloprid were 256.06, 213 [8], 175.1 [12], 67, 20, positive, 4, respectively. For desnitro-imidacloprid, these parameters were— parent ion (m/z): 211.1, quant Ion (m/z) [Collision Energy, V]: 126 [22], qual Ion (m/z) [Collision Energy, V]: 90.03 [36], fragment voltage (V): 63, dwell time (ms): 200, polarity: positive, and accelerator voltage (V): 4.

We used Agilent 1260 liquid chromatography system with diode array detection (DAD) to measure acetanilide concentration [Column: Higgins Analytical Sprite Targa C18 (40 x 2.1 mm, 5  $\mu\text{m}$ ) with a guard column]. The analytical parameters were as follows— peak wavelength: 238.5 nm, column temperature: 50 deg C, injection volume: 10  $\mu\text{L}$ , pump flow: 0.6 mL/min, method

length: 10 min, mobile phase A: 15% methanol with 0.1% formic acid, and mobile phase B: 85% water with 0.1% formic acid.

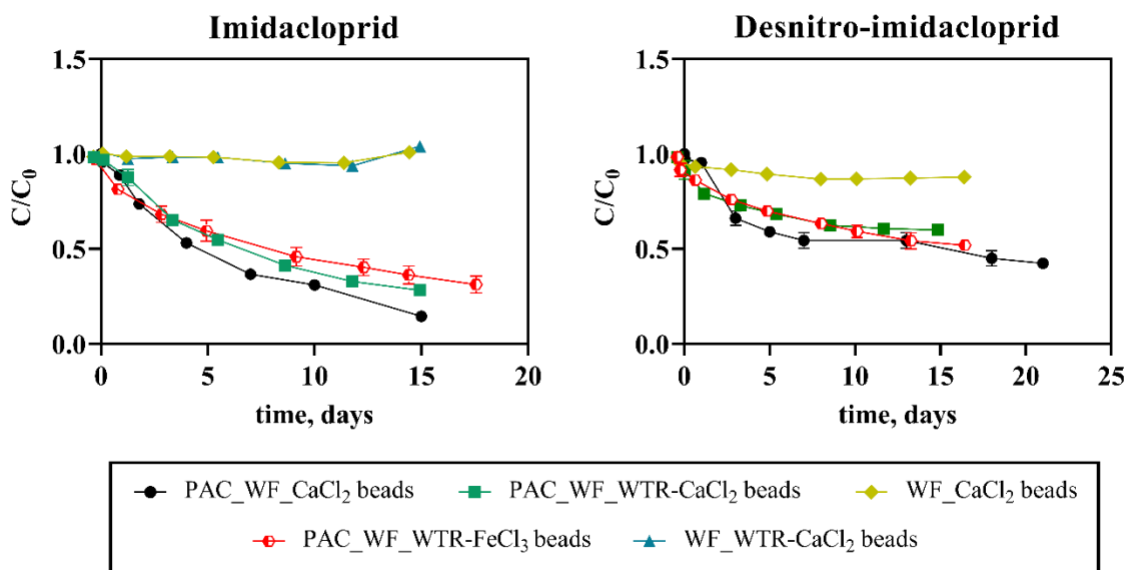

**Figure S 1.** Neonicotinoid sorption onto different BioSorp Beads. Error bars represent the standard error about the mean (error bars too small to see are obscured by the data points).

\*Desnitro-imidacloprid sorption experiment was not conducted with WF\_WTR-CaCl<sub>2</sub> beads.

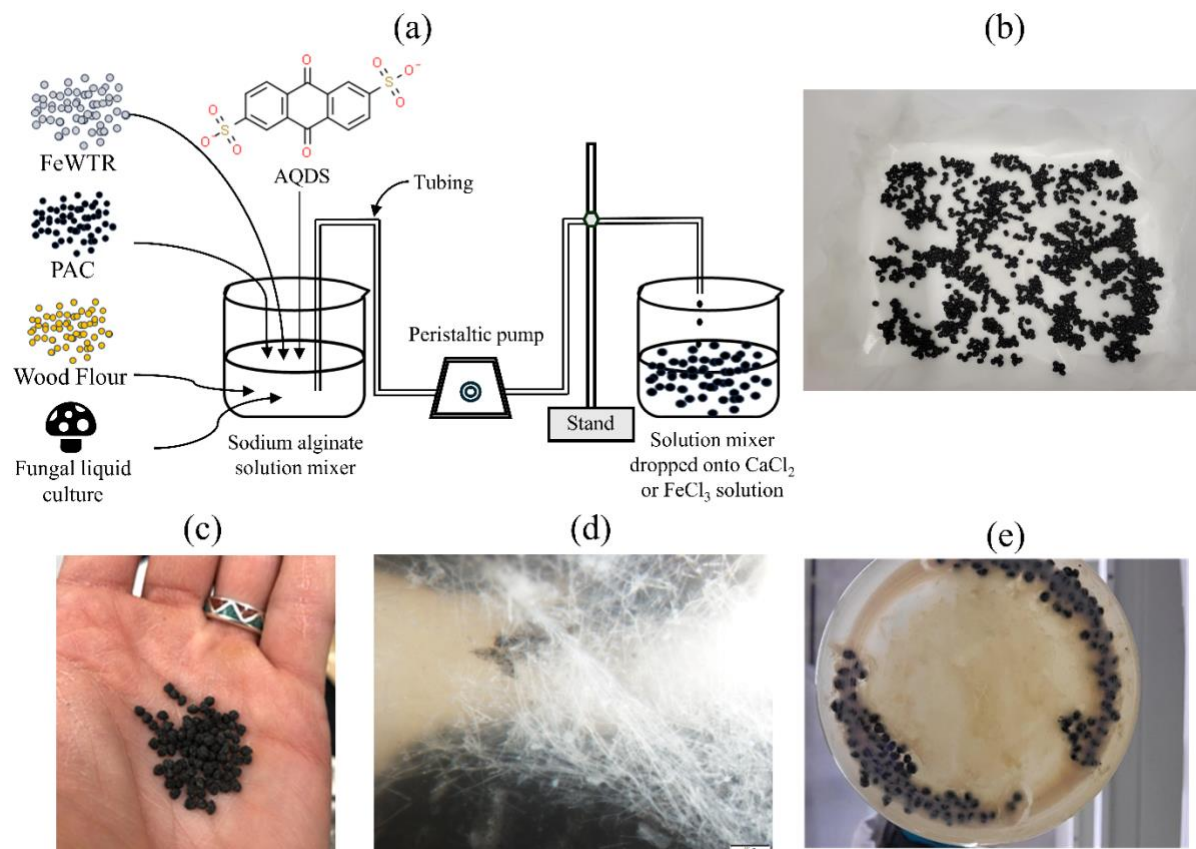

**Figure S 2.** Overview summary of BioSorp Bead preparation. (a) BioSorp Bead preparation method wherein dry amendments are mixed into dissolved sodium alginate solution that is added dropwise into a polyvalent cation solution via peristaltic pump to instantaneously form beads, (b) Wet beads (freshly prepared) drying on wax paper, (c) Dried BioSorp Beads, (d) Stereoscope image of white rot fungi (*Trametes versicolor*) growing from BioSorp Beads (made with 1% sodium alginate, 1% powder activated carbon, 1% wood flour, and 3% CaCl<sub>2</sub>), and (e) *Trametes versicolor* grew from the BioSorp beads and spread into malt extract media.

**Table S 1.** Compositions of different types of BioSorp beads.

| Testing conditions                            |                    | Bead Preparation Recipe       |                           |                   |                                  |     |            |        | Drying Temperature                |
|-----------------------------------------------|--------------------|-------------------------------|---------------------------|-------------------|----------------------------------|-----|------------|--------|-----------------------------------|
|                                               |                    | Sodium Alginate Concentration | Crosslinker Concentration | Cross-linker Type | External Electron Shuttle (AQDS) | PAC | Wood Flour | Fe-WTR |                                   |
| 1. Varied Alginate Concentration              | Baseline condition | 1%                            | 270.3 mM                  | CaCl <sub>2</sub> | -                                | 1%  | 1%         | -      | Air dried at room temp            |
|                                               | Other conditions   | 0.5%, 1.5%                    | 270.3 mM                  | CaCl <sub>2</sub> | -                                | 1%  | 1%         | -      | Air dried at room temp            |
| 2. Varied Cross-linker Concentration          | Baseline condition | 1%                            | 270.3 mM                  | CaCl <sub>2</sub> | -                                | 1%  | 1%         | -      | Air dried at room temp            |
|                                               | Other conditions   | 1%                            | 450.5 mM                  | CaCl <sub>2</sub> | -                                | 1%  | 1%         | -      | Air dried at room temp            |
| 3. Varied Cross-linker Type                   | Baseline condition | 1%                            | 270.3 mM                  | CaCl <sub>2</sub> | -                                | 1%  | 1%         | -      | Air dried at room temp            |
|                                               | Other conditions   | 1%                            | 270.3 mM                  | FeCl <sub>3</sub> | -                                | 1%  | 1%         | -      | Air dried at room temp            |
| 4. Effects of External Electron Shuttle       | Baseline condition | 1%                            | 270.3 mM                  | CaCl <sub>2</sub> | -                                | 1%  | 1%         | 1%     | Air dried at room temp            |
|                                               | Other conditions   | 1%                            | 270.3 mM                  | CaCl <sub>2</sub> | 0.1%                             | 1%  | 1%         | 1%     | Air dried at room temp            |
| 5. Effects of Cross-linker Type on Mechanical | Baseline condition | 1%                            | 270.3 mM                  | CaCl <sub>2</sub> | 0.1%                             | 1%  | 1%         | 1%     | Air dried at room temp            |
|                                               | Other conditions   | 1%                            | 270.3 mM                  | FeCl <sub>3</sub> | 0.1%                             | 1%  | 1%         | 1%     | Air dried at room temp            |
| 6. Drying Temperature                         | Baseline condition | 1%                            | 270.3 mM                  | CaCl <sub>2</sub> | 0.1%                             | 1%  | 1%         | 1%     | Air dried at room temp            |
|                                               | Other conditions   | 1%                            | 270.3 mM                  | CaCl <sub>2</sub> | 0.1%                             | 1%  | 1%         | 1%     | Oven dried (at 70° C for 8 hours) |

**Table S 2 (a).** Experimental design for abiotic sorption experiments.

| Experiment Type                                                              | Experiments                                              | Contaminant                                                          | Sorbent                |                        |                              | sorbent mass (mg)            | Solvent                      | solvent volume (mL) |
|------------------------------------------------------------------------------|----------------------------------------------------------|----------------------------------------------------------------------|------------------------|------------------------|------------------------------|------------------------------|------------------------------|---------------------|
| Abiotic Sorption Experiment                                                  | Dissolved phosphorus sorption kinetics                   | 50 mg/L phosphate                                                    | Calcium alginate beads | Baseline condition     | PAC_WF_WTR                   | 100                          | Synthetic stormwater (pH ~7) | 100                 |
|                                                                              |                                                          |                                                                      |                        | Other condition        | WF_WTR; PAC_WF; WF           |                              |                              |                     |
|                                                                              |                                                          |                                                                      | Ferric alginate beads  | Baseline condition     | PAC_WF_WTR                   |                              |                              |                     |
|                                                                              |                                                          |                                                                      |                        | Other condition        | WF_WTR; WTR; WF; PAC_WF; PAC |                              |                              |                     |
|                                                                              | Acetanilide sorption kinetics                            | 40 mg/L acetanilide                                                  | PAC                    |                        |                              | 50                           | Synthetic stormwater (pH ~7) | 100                 |
|                                                                              |                                                          |                                                                      | Calcium alginate beads | Baseline condition     | PAC_WF_WTR                   | 100                          |                              |                     |
|                                                                              |                                                          |                                                                      |                        | Other condition        | PAC_WF                       |                              |                              |                     |
|                                                                              | Ferric alginate beads                                    | PAC_WF_WTR                                                           |                        |                        |                              |                              |                              |                     |
|                                                                              | Imidacloprid and desnitro-imidacloprid sorption kinetics | 30 mg/L imidacloprid and 30mg/L desnitro-imidacloprid                | Calcium alginate beads | Baseline condition     | PAC_WF_WTR                   | 100                          | Synthetic stormwater (pH ~7) | 100                 |
|                                                                              |                                                          |                                                                      |                        | Other condition        | PAC_WF                       |                              |                              |                     |
|                                                                              |                                                          |                                                                      | Ferric alginate beads  | PAC_WF_WTR             |                              |                              |                              |                     |
|                                                                              | Imidacloprid and desnitro-imidacloprid sorption isotherm | imidacloprid and desnitro-imidacloprid (10, 15, 20, 25, and 30 mg/L) | Calcium alginate beads | PAC_WF                 |                              | 100                          | Synthetic stormwater (pH ~7) | 100                 |
| Ferric alginate beads                                                        |                                                          |                                                                      | PAC_WF                 |                        |                              |                              |                              |                     |
| Effects of varied alginate concentrations on neonicotinoid sorption kinetics | 10 mg/L imidacloprid and 10mg/L desnitro-imidacloprid    | Calcium alginate beads (PAC_WF)                                      | Baseline condition     | 1% (w/v)               | 100                          | Synthetic stormwater (pH ~7) | 100                          |                     |
|                                                                              |                                                          |                                                                      | Other condition        | 0.5% (w/v), 1.5% (w/v) |                              |                              |                              |                     |

**Table S 2 (b).** Experimental design for abiotic sorption experiments.

| Experiment Type             | Experiments                                                                     | Contaminant                                           | Sorbent                         |                    |                                             | sorbent mass (mg) | Solvent                      | solvent volume (mL) |
|-----------------------------|---------------------------------------------------------------------------------|-------------------------------------------------------|---------------------------------|--------------------|---------------------------------------------|-------------------|------------------------------|---------------------|
| Abiotic Sorption Experiment | Effects of varied crosslinker concentrations on neonicotinoid sorption kinetics | 10 mg/L imidacloprid and 10mg/L desnitro-imidacloprid | Calcium alginate beads (PAC_WF) | Baseline condition | 3% (w/v)                                    | 100               | Synthetic stormwater (pH ~7) | 100                 |
|                             |                                                                                 |                                                       |                                 | Other condition    | 5% (w/v)                                    |                   |                              |                     |
|                             | Effects of varied drying temperature on neonicotinoid sorption kinetics         | 10 mg/L imidacloprid and 10mg/L desnitro-imidacloprid | Calcium alginate beads (PAC_WF) | Baseline condition | air drying at room temp                     | 100               | Synthetic stormwater (pH ~7) | 100                 |
|                             |                                                                                 |                                                       |                                 | Other condition    | Oven dried (at 40° C and 70° C for 8 hours) |                   |                              |                     |
|                             | PFAS sorption kinetics                                                          | 10 mg/L PFOA, PFBA, and PFBS                          | Calcium alginate beads          | Baseline condition | PAC_WF_WTR                                  | 30                | Synthetic stormwater (pH ~7) | 200                 |
|                             |                                                                                 |                                                       |                                 | Other condition    | PAC_WF; WF_WTR                              |                   |                              |                     |
| Ferric alginate beads       |                                                                                 |                                                       | Baseline condition              | PAC_WF_WTR         |                                             |                   |                              |                     |
|                             |                                                                                 |                                                       | Other condition                 | WF_WTR             |                                             |                   |                              |                     |



**Table S 3.** Experimental design for coupled sorption-biodegradation experiments.

| Experiment Type                     | Contaminant         | Fungi         | Bead               |                    | Bead mass (mg)                                                          | Solvent | solvent volume (mL)          |     |
|-------------------------------------|---------------------|---------------|--------------------|--------------------|-------------------------------------------------------------------------|---------|------------------------------|-----|
| Coupled sorption and biodegradation | 40 mg/L acetanilide | T. versicolor | Treatment          | Baseline condition | PAC_WF_WTR_CaCl <sub>2</sub> and PAC_WF_WTR_FeCl <sub>3</sub>           | 100     | Synthetic stormwater (pH ~7) | 100 |
|                                     |                     |               |                    | Other condition    | PAC_WF_WTR_AQDS_CaCl <sub>2</sub> and PAC_WF_WTR_AQDS_FeCl <sub>3</sub> |         |                              |     |
|                                     |                     |               | Autoclaved control | Baseline condition | PAC_WF_WTR_CaCl <sub>2</sub> and PAC_WF_WTR_FeCl <sub>3</sub>           |         |                              |     |
|                                     |                     |               |                    | Other condition    | PAC_WF_WTR_AQDS_CaCl <sub>2</sub> and PAC_WF_WTR_AQDS_FeCl <sub>3</sub> |         |                              |     |
|                                     |                     |               | Azide control      | Baseline condition | PAC_WF_WTR_CaCl <sub>2</sub> and PAC_WF_WTR_FeCl <sub>3</sub>           |         |                              |     |
|                                     |                     |               |                    | Other condition    | PAC_WF_WTR_AQDS_CaCl <sub>2</sub> and PAC_WF_WTR_AQDS_FeCl <sub>3</sub> |         |                              |     |
|                                     |                     | P. ostreatus  | Treatment          | Baseline condition | PAC_WF_WTR_CaCl <sub>2</sub> and PAC_WF_WTR_FeCl <sub>3</sub>           |         |                              |     |
|                                     |                     |               |                    | Other condition    | PAC_WF_WTR_AQDS_CaCl <sub>2</sub> and PAC_WF_WTR_AQDS_FeCl <sub>3</sub> |         |                              |     |
|                                     |                     |               | Autoclaved control | Baseline condition | PAC_WF_WTR_CaCl <sub>2</sub> and PAC_WF_WTR_FeCl <sub>3</sub>           |         |                              |     |
|                                     |                     |               |                    | Other condition    | PAC_WF_WTR_AQDS_CaCl <sub>2</sub> and PAC_WF_WTR_AQDS_FeCl <sub>3</sub> |         |                              |     |
|                                     |                     |               | Azide control      | Baseline condition | PAC_WF_WTR_CaCl <sub>2</sub> and PAC_WF_WTR_FeCl <sub>3</sub>           |         |                              |     |
|                                     |                     |               |                    | Other condition    | PAC_WF_WTR_AQDS_CaCl <sub>2</sub> and PAC_WF_WTR_AQDS_FeCl <sub>3</sub> |         |                              |     |

**Table S 4.** First order rate constants (with 95% confidence interval level) for imidacloprid and desnitro-imidacloprid sorption onto different PAC-Wood dust beads. [The detailed compositions of these beads are in **Table S 1**]

| Bead type                      | Imidacloprid                    |                | Desnitro-imidacloprid           |                |
|--------------------------------|---------------------------------|----------------|---------------------------------|----------------|
|                                | 1st order rate constant (1/day) | r <sup>2</sup> | 1st order rate constant (1/day) | r <sup>2</sup> |
| 0.5% SA - 3% CaCl <sub>2</sub> | 0.22 (0.19 to 0.25)             | 0.97           | 0.21 (0.19 to 0.23)             | 0.96           |
| 1% SA - 3% CaCl <sub>2</sub>   | 0.19 (0.15 to 0.23)             | 0.99           | 0.18 (0.14 to 0.22)             | 0.97           |
| 1.5% SA - 3% CaCl <sub>2</sub> | 0.13 (0.11 to 0.14)             | 0.98           | 0.17 (0.16 to 0.19)             | 0.95           |
| 1% SA - 5% CaCl <sub>2</sub>   | 0.16 (0.14 to 0.17)             | 0.99           | 0.15 (0.11 to 0.18)             | 0.95           |
| T40                            | 0.21 (0.20 to 0.22)             | 0.99           | 0.18 (0.13 to 0.24)             | 0.96           |
| T70                            | 0.18 (0.11 to 0.24)             | 0.97           | 0.17 (0.16 to 0.19)             | 0.93           |

\*3% CaCl<sub>2</sub>= 270.3 mM CaCl<sub>2</sub>.

\*\*T40= beads oven dried at 40 deg C.

\*\*\*T70= beads oven dried at 70 deg C.

**Table S 5.** Phosphate sorption (with 95% confidence interval level) onto various BioSorp beads (Calcium-alginate and iron-alginate beads).

| Types of beads               | maximum phosphate sorption capacity (mg/g) | adsorption rate constant, k <sub>ad</sub> (day <sup>-1</sup> ) | r <sup>2</sup> |
|------------------------------|--------------------------------------------|----------------------------------------------------------------|----------------|
| WF-WTR-CaCl <sub>2</sub>     | 13.01 (11.26 to 15.42)                     | 0.37 (0.20 to 0.72)                                            | 0.83           |
| PAC_WF_WTR_CaCl <sub>2</sub> | 8.25 (7.70 to 8.88)                        | 0.27 (0.21 to 0.34)                                            | 0.97           |
| WF_CaCl <sub>2</sub>         | 2.10 at day 18 (poor model fit)            | 0.13                                                           | -              |
| PAC_WF_CaCl <sub>2</sub>     | 0.88 at day 18                             | * did not follow Langmuir adsorption model                     | -              |
| WF-WTR-FeCl <sub>3</sub>     | 42.12 (38.79 to 45.82)                     | 0.99 (0.53 to 1.89)                                            | 0.89           |
| WTR_FeCl <sub>3</sub>        | 38.88 (36.96 to 40.82)                     | 1.33 (0.98 to 1.84)                                            | 0.96           |
| WF_FeCl <sub>3</sub>         | 34.03 (32.09 to 35.99)                     | 1.52 (1.07 to 2.29)                                            | 0.95           |
| PAC_WF_FeCl <sub>3</sub>     | 29.55 (26.97 to 32.46)                     | 0.37 (0.26 to 0.55)                                            | 0.92           |
| PAC_FeCl <sub>3</sub>        | 24.98 (21.51 to 30.09)                     | 0.29 (0.16 to 0.61)                                            | 0.89           |
| PAC_WF_WTR_FeCl <sub>3</sub> | 17.03 (15.89 to 18.37)                     | 0.20 (0.17 to 0.25)                                            | 0.98           |

**Table S 6.** Acetanilide, Imidacloprid, and Desnitro-imidacloprid sorption (with 95% confidence interval level) onto various BioSorp beads (Calcium-alginate and iron-alginate beads).

| Sorbent                           | Maximum sorption capacity (mg/g) |                        |                        |
|-----------------------------------|----------------------------------|------------------------|------------------------|
|                                   | Acetanilide                      | Imidacloprid           | Desnitro-imidacloprid  |
| PAC                               | 73.77 (70.88 to 76.68)           | 112 (111.19 to 112.81) | 37 (35.4 to 38.6)      |
| PAC_WF_CaCl <sub>2</sub> bead     | 39.43 (36.49 to 42.45)           | 26.39 (25.35 to 27.54) | 14.96 (13.89 to 16.13) |
| PAC_WF_WTR_CaCl <sub>2</sub> bead | 38.86 (36.91 to 40.85)           | 25.52 (23.05 to 29.03) | 11.14 (10.52 to 11.83) |
| PAC_WF_WTR_FeCl <sub>3</sub> bead | 38.33 (35.77 to 40.96)           | 18.52 (17.15 to 20.32) | 13.04 (11.75 to 14.88) |

**Table S 7.** Sorption of different long and short-chain PFAS onto various BioSorp beads (Calcium-alginate and iron-alginate beads), different black carbon materials, iron-based materials, and aluminum-based materials.

| Types                    | Sorbent Material                                                                  | PFOA sorption capacity (mg/g)                    | PFBA sorption capacity (mg/g)                   | PFBS sorption capacity (mg/g)                   | Reference                              |
|--------------------------|-----------------------------------------------------------------------------------|--------------------------------------------------|-------------------------------------------------|-------------------------------------------------|----------------------------------------|
| BioSorp beads            | 1% sodium alginate-1% PAC-1% Wood flour-3% CaCl <sub>2</sub> Beads                | 8.85 ( <i>PAC normalized capacity = 25.67</i> )  | 5.17 ( <i>PAC normalized capacity = 14.99</i> ) | 3.40 ( <i>PAC normalized capacity = 9.86</i> )  | This study                             |
|                          | 1% sodium alginate-1% PAC-1% Wood flour-1% FeWTR-3% CaCl <sub>2</sub> Beads       | 6.50 ( <i>PAC normalized capacity = 25.35</i> )  | 1.44 ( <i>PAC normalized capacity = 5.62</i> )  | 2.20 ( <i>PAC normalized capacity = 8.58</i> )  | This study                             |
|                          | 1% sodium alginate-1% Wood flour-1% FeWTR-3% CaCl <sub>2</sub> Beads              | 0                                                | 0                                               | 0.39                                            | This study                             |
|                          | 1% sodium alginate-1% Wood dust-3% CaCl <sub>2</sub> Beads                        | 0                                                | 0                                               | 0                                               | This study                             |
|                          | 1% sodium alginate-1% PAC-1% Wood flour-270.3 mM FeCl <sub>3</sub> Beads          | 13.10 ( <i>PAC normalized capacity = 37.78</i> ) | 1.20 ( <i>PAC normalized capacity = 3.46</i> )  | 5.07 ( <i>PAC normalized capacity = 14.62</i> ) | This study                             |
|                          | 1% sodium alginate-1% PAC-1% Wood flour-1% FeWTR-270.3 mM FeCl <sub>3</sub> Beads | 9.27 ( <i>PAC normalized capacity = 35.5</i> )   | 0                                               | 4.57 ( <i>PAC normalized capacity = 17.5</i> )  | This study                             |
|                          | 1% sodium alginate-1% Wood flour-1% FeWTR-270.3 mM FeCl <sub>3</sub> Beads        | 6.91                                             | 0                                               | 0.84                                            | This study                             |
|                          | 2% sodium alginate-3% Biochar-4% CaCl <sub>2</sub> beads                          | n.a.                                             | n.a.                                            | 2.895                                           | Militao et al. <sup>1</sup> (2023)     |
| Alginate composite beads | Biochar (made from spent coffee ground)                                           | 12.87                                            | n.a.                                            | n.a.                                            | Steigerwald et al. <sup>2</sup> (2023) |
| Black C materials        | GAC                                                                               | 8.54                                             | 3.01                                            | n.a.                                            | Riegel et al. <sup>3</sup> (2023)      |
|                          | Coconut-based GAC                                                                 | 12.2 ± 0.2 (after 10 days)                       | n.a.                                            | n.a.                                            | Siriwardena et al. <sup>4</sup> (2018) |
|                          | Biochar                                                                           | 16.5*10 <sup>-5</sup>                            | n.a.                                            | 8*10 <sup>-5</sup>                              | Dalahmeh et al. <sup>5</sup> (2019)    |

**Table S 6. (continued)**

| Types                | Sorbent Material                                     | PFOA sorption capacity (mg/g) | PFBA sorption capacity (mg/g) | PFBS sorption capacity (mg/g) | Reference                              |
|----------------------|------------------------------------------------------|-------------------------------|-------------------------------|-------------------------------|----------------------------------------|
| Black C materials    | Coal based GAC                                       | 13.6 ± 0.1 (after 10 days)    | n.a.                          | n.a.                          | Siriwardena et al. <sup>4</sup> (2018) |
|                      | GAC                                                  | 22.7                          | n.a.                          | n.a.                          | Yao et al. <sup>6</sup> (2014)         |
|                      | GAC                                                  | 35.69                         | 6.72                          | 14.49                         | Zhang et al. <sup>7</sup> (2021)       |
|                      | GAC                                                  | 52.8                          | n.a.                          | n.a.                          | Zhang et al. <sup>8</sup> (2016)       |
|                      | PAC                                                  | 0.11                          | n.a.                          | 7*10 <sup>-4</sup>            | Murray et al. <sup>9</sup> (2019)      |
|                      | PAC                                                  | 2.49                          | n.a.                          | n.a.                          | Zhi et al. <sup>10</sup> (2015)        |
|                      | PAC                                                  | 16.5                          | n.a.                          | n.a.                          | Qu et al. <sup>11</sup> (2009)         |
|                      | PAC                                                  | 484                           | n.a.                          | n.a.                          | Li et al. <sup>12</sup> (2017)         |
|                      | Different types of activated carbon felts            | 2.08 to 156                   | n.a.                          | n.a.                          | Saeidi et al. <sup>13</sup> (2020)     |
| Iron based materials | Iron-Filings-based Green Environmental Media (IFGEM) | 7*10 <sup>-9</sup>            | n.a.                          | n.a.                          | Ordonez et al. <sup>14</sup> (2022)    |
| AL based materials   | Aluminum-based Green Environmental Media (AGEM)      | 1.5*10 <sup>-6</sup>          | n.a.                          | n.a.                          | Ordonez et al. <sup>14</sup> (2022)    |
|                      | Aluminum-water treatment residuals                   | 0.094 (at pH 7)               | n.a.                          | n.a.                          | Zhang et al. <sup>15</sup> (2021)      |

**REFERENCES.**

- 1 I. M. Militao, F. Roddick, L. Fan, L. C. Zepeda, R. Parthasarathy and R. Bergamasco, PFAS removal from water by adsorption with alginate-encapsulated plant albumin and rice straw-derived biochar, *Journal of Water Process Engineering*, 2023, **53**, 103616.
- 2 J. M. Steigerwald, S. Peng and J. R. Ray, Novel Perfluorooctanesulfonate-Imprinted Polymer Immobilized on Spent Coffee Grounds Biochar for Selective Removal of Perfluoroalkyl Acids in Synthetic Wastewater, *ACS ES&T Engineering*, 2023, **3**, 520–532.
- 3 M. Riegel, B. Haist-Gulde and F. Sacher, Sorptive removal of short-chain perfluoroalkyl substances (PFAS) during drinking water treatment using activated carbon and anion exchanger, *Environ Sci Eur*, 2023, **35**, 12.
- 4 D. P. Siriwardena, M. Crimi, T. M. Holsen, C. Bellona, C. Divine and E. Dickenson, Changes in Adsorption Behavior of Perfluorooctanoic Acid and Perfluorohexanesulfonic Acid Through Chemically-Facilitated Surface Modification of Granular Activated Carbon, *Environ Eng Sci*, 2018, **36**, 453–465.

- 5 S. S. Dalahmeh, N. Alziq and L. Ahrens, Potential of biochar filters for onsite wastewater treatment: Effects of active and inactive biofilms on adsorption of per- and polyfluoroalkyl substances in laboratory column experiments, *Environmental Pollution*, 2019, **247**, 155–164.
- 6 Y. Yao, K. Volchek, C. E. Brown, A. Robinson and T. Obal, Comparative study on adsorption of perfluorooctane sulfonate (PFOS) and perfluorooctanoate (PFOA) by different adsorbents in water, *Water Science and Technology*, 2014, **70**, 1983–1991.
- 7 D. Zhang, Q. He, M. Wang, W. Zhang and Y. Liang, Sorption of perfluoroalkylated substances (PFASs) onto granular activated carbon and biochar, *Environ Technol*, 2021, **42**, 1798–1809.
- 8 D. Zhang, Q. Luo, B. Gao, S.-Y. D. Chiang, D. Woodward and Q. Huang, Sorption of perfluorooctanoic acid, perfluorooctane sulfonate and perfluoroheptanoic acid on granular activated carbon, *Chemosphere*, 2016, **144**, 2336–2342.
- 9 C. C. Murray, H. Vatankhah, C. A. McDonough, A. Nickerson, T. T. Hedtke, T. Y. Cath, C. P. Higgins and C. L. Bellona, Removal of per- and polyfluoroalkyl substances using super-fine powder activated carbon and ceramic membrane filtration, *J Hazard Mater*, 2019, **366**, 160–168.
- 10 Y. Zhi and J. Liu, Adsorption of perfluoroalkyl acids by carbonaceous adsorbents: Effect of carbon surface chemistry, *Environmental Pollution*, 2015, **202**, 168–176.
- 11 Y. Qu, C. Zhang, F. Li, X. Bo, G. Liu and Q. Zhou, Equilibrium and kinetics study on the adsorption of perfluorooctanoic acid from aqueous solution onto powdered activated carbon, *J Hazard Mater*, 2009, **169**, 146–152.
- 12 J. Li, Q. Li, L. Li and L. Xu, Removal of perfluorooctanoic acid from water with economical mesoporous melamine-formaldehyde resin microsphere, *Chemical Engineering Journal*, 2017, **320**, 501–509.
- 13 N. Saeidi, F.-D. Kopinke and A. Georgi, Understanding the effect of carbon surface chemistry on adsorption of perfluorinated alkyl substances, *Chemical Engineering Journal*, 2020, **381**, 122689.
- 14 D. Ordonez, A. Valencia, A. H. M. A. Sadmani and N.-B. Chang, Green sorption media for the removal of perfluorooctanesulfonic acid (PFOS) and perfluorooctanoic acid (PFOA) from water, *Science of The Total Environment*, 2022, **819**, 152886.
- 15 Z. Zhang, D. Sarkar, R. Datta and Y. Deng, Adsorption of perfluorooctanoic acid (PFOA) and perfluorooctanesulfonic acid (PFOS) by aluminum-based drinking water treatment residuals, *Journal of Hazardous Materials Letters*, 2021, **2**, 100034.
